# Supplementary material
Source: PubMed Central journal article supplement (PMC3879625)
Supplement: supp_M113.034769_1.pdf [file supp_M113.034769_1.pdf]

## Supplemental Figure Legends

**Supplemental Figure 1.** Number of MS/MS scans, PSMs and unique peptide identifications over a 70-minute LC-MS/MS gradient at MS<sup>1</sup> resolving powers of 15,000, 30,000, 60,000, 120,000, 240,000 and 450,000, at *m/z* 200.

**Supplemental Figure 2.** Number of MS/MS scans, PSMs and unique peptide identifications over a 70-minute LC-MS/MS gradient at maximum injection times of 30, 35, 45 and 60 msec.

**Supplemental Figure 3.** Number of MS/MS scans, PSMs and unique peptide identifications over a 70-minute LC-MS/MS gradient at dynamic exclusion settings of 15, 30, 45 and 60 seconds.

**Supplemental Figure 4.** Number of MS/MS scans, PSMs and unique peptide identifications over a 70-minute LC-MS/MS gradient using precursor isolation widths of 0.7, 1.0, 1.4, 1.7, 2.0, 2.3 and 2.6 *m/z*.

**Supplemental Figure 5.** Number of MS/MS scans, PSMs and unique peptide identifications over a 70-minute LC-MS/MS gradient using MS<sup>1</sup> AGC targets of 8e4, 1e5, 2e5 and 5e5.

**Supplemental Figure 6.** Number of MS/MS scans, PSMs and unique peptide identifications over a 70-minute LC-MS/MS gradient using MS<sup>2</sup> AGC targets of 3e3, 5e3, 7e3 and 1e4, all at an MS<sup>2</sup> max inject time of 35 msec.

**Supplemental Figure 7.** Increase in peptide identifications with more vigorous bead milling conditions. Conditions are listed as time of constant milling (min), frequency of shaking (Hz), and number of repeats. The (\*) indicates that lysate was not cleared.

**Supplemental Figure 8.** A. Distribution of intensities of peptide precursors in the survey scan prior to the MS<sup>2</sup> event, in which the peptide was identified, with and without the addition of DMSO. B. Total ion current area with and without the addition of DMSO.

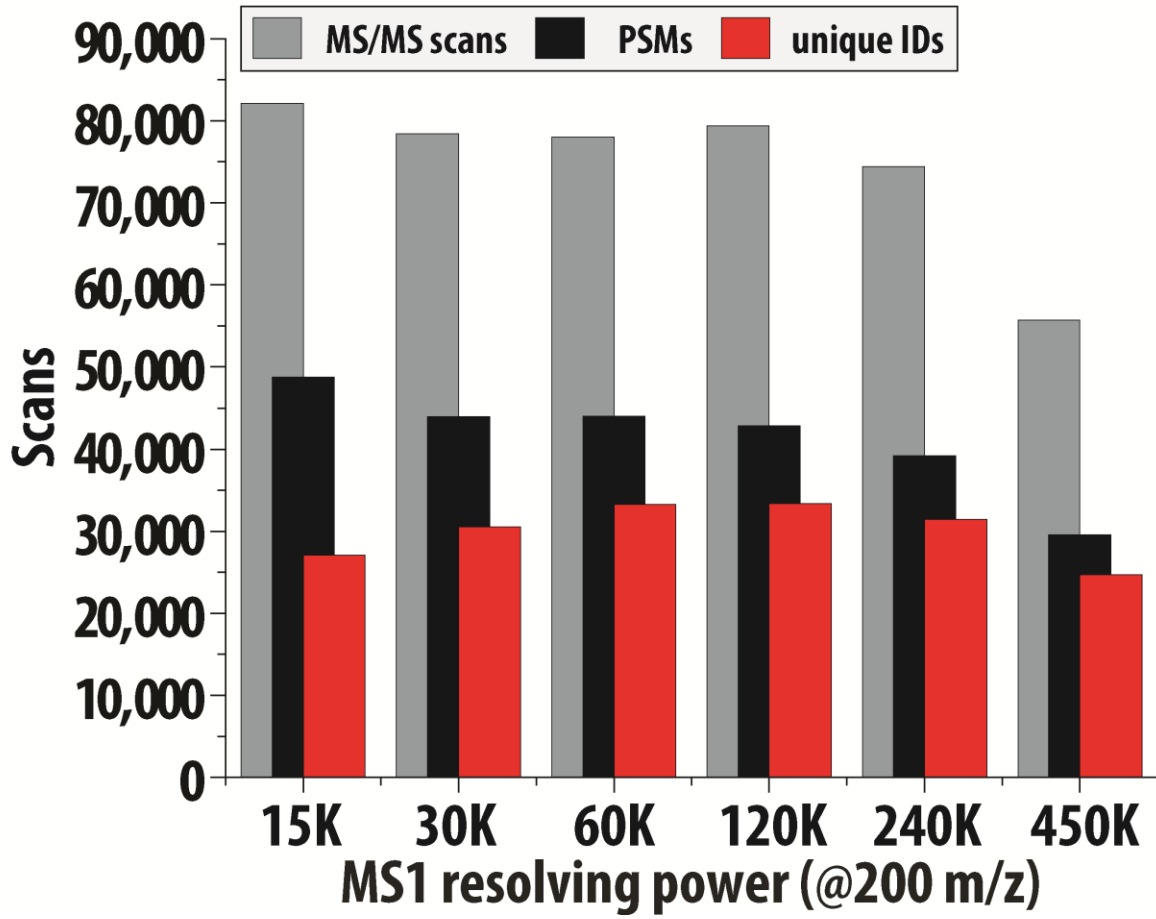

Supplemental Figure 1

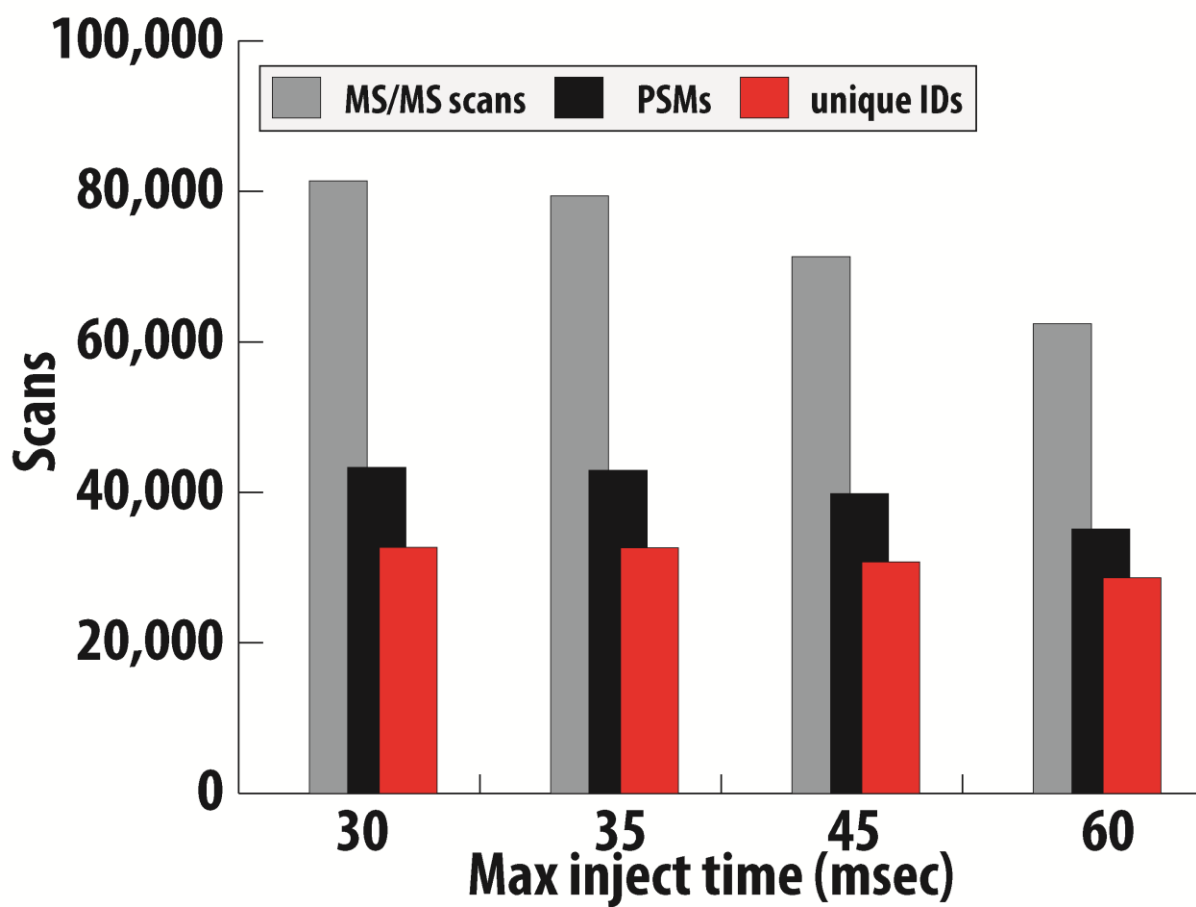

Supplemental Figure 2

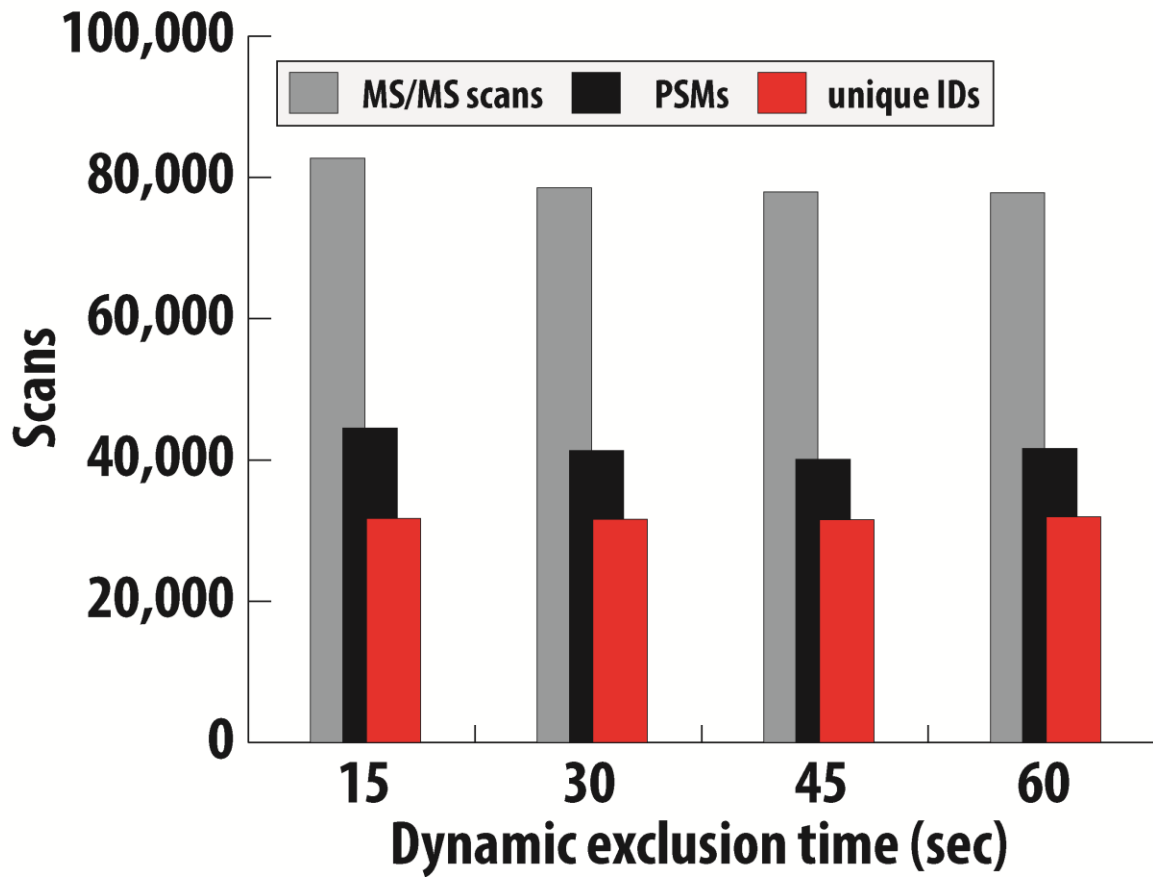

Supplemental Figure 3

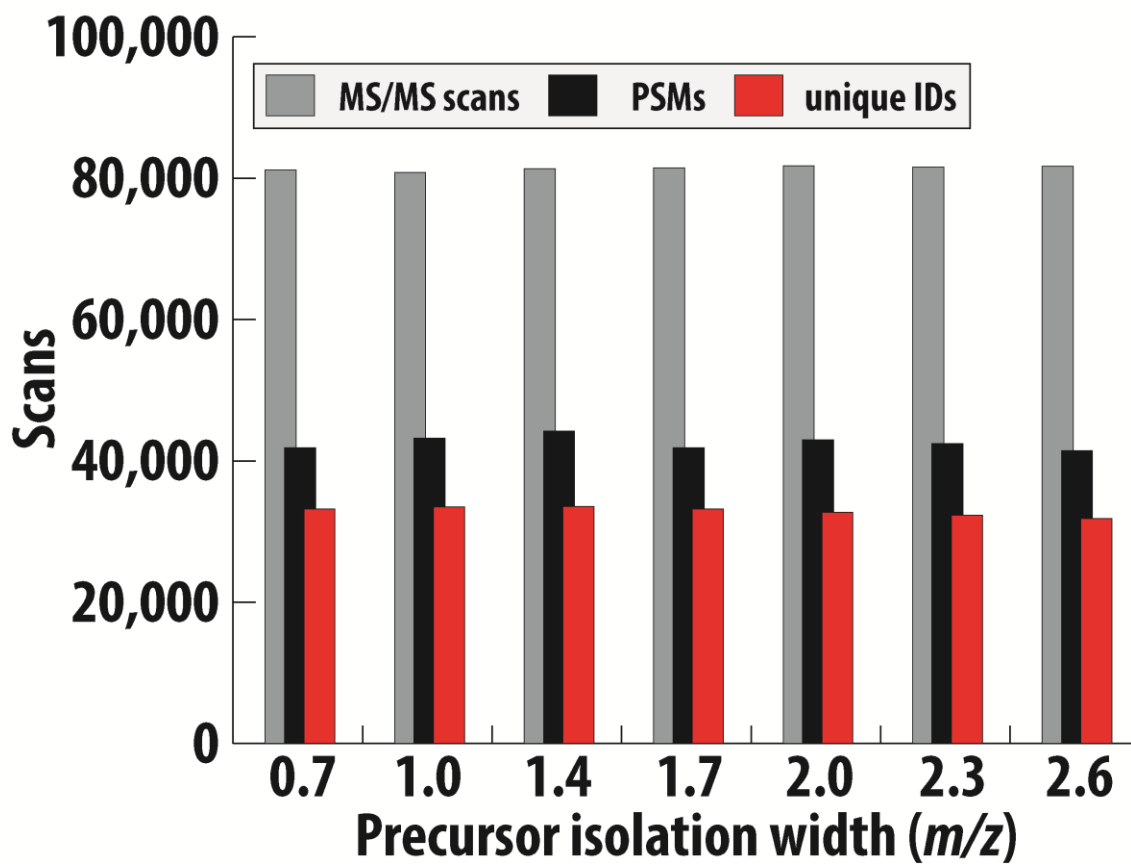

Supplemental Figure 4

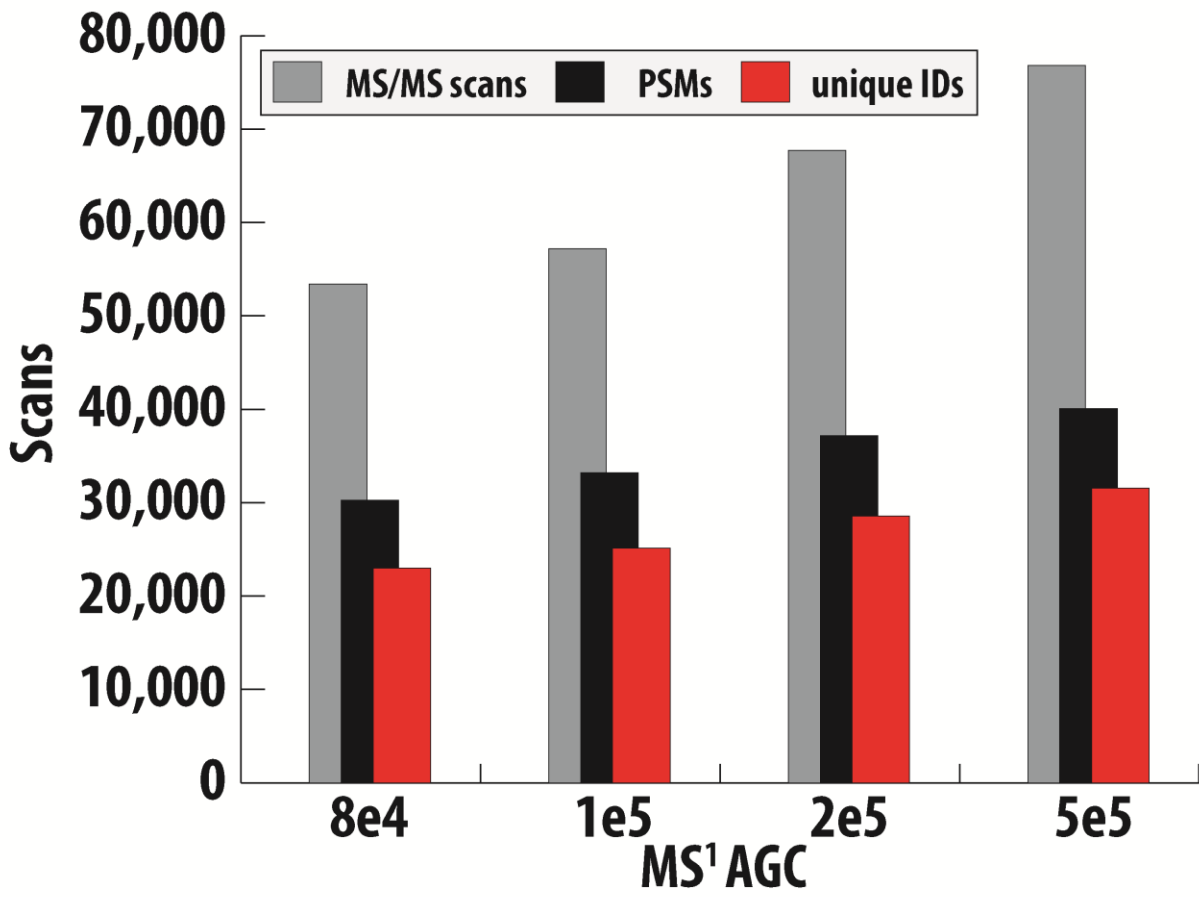

Supplemental Figure 5

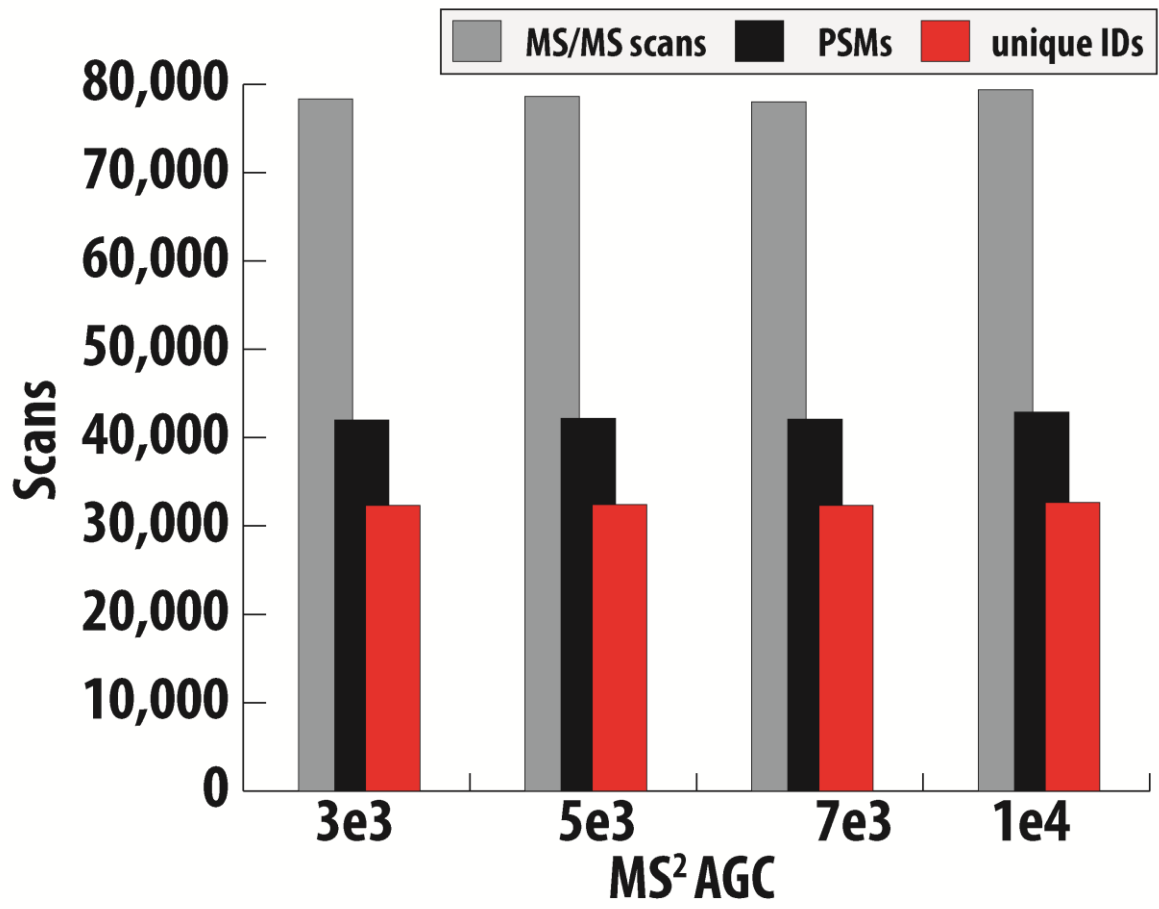

Supplemental Figure 6

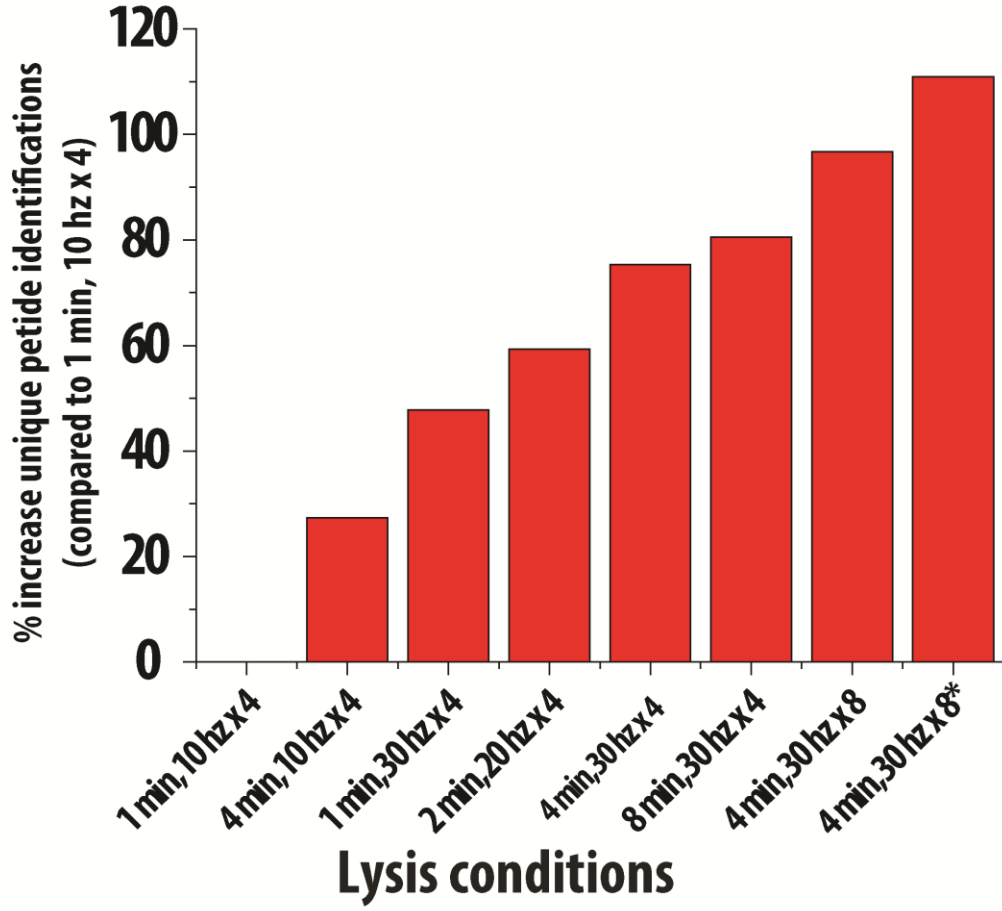

Supplemental Figure 7



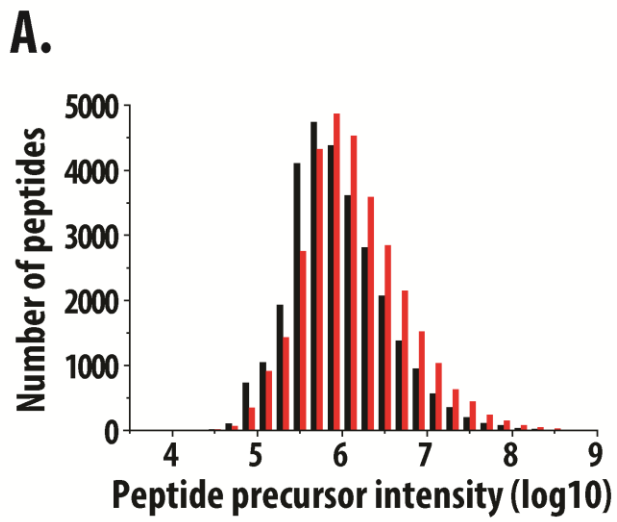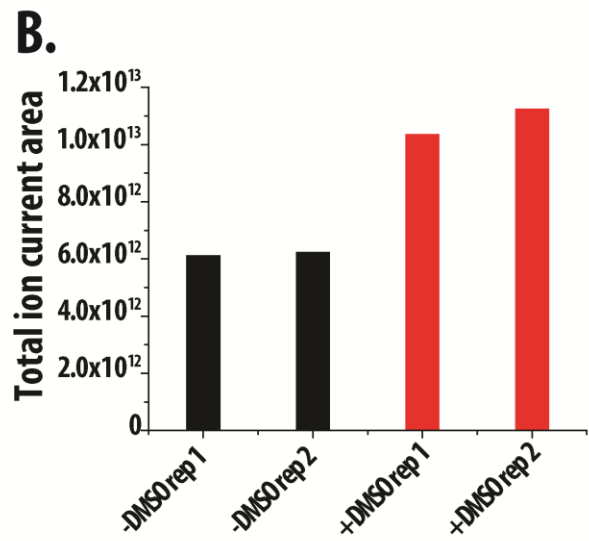

Supplemental Figure 8
